# Supplementary material
Source: Springer Nature journal article supplement (https://www.springermedizin.de/resource/supplementary/13102_2013_26_MOESM1_ESM.pdf/9686434)

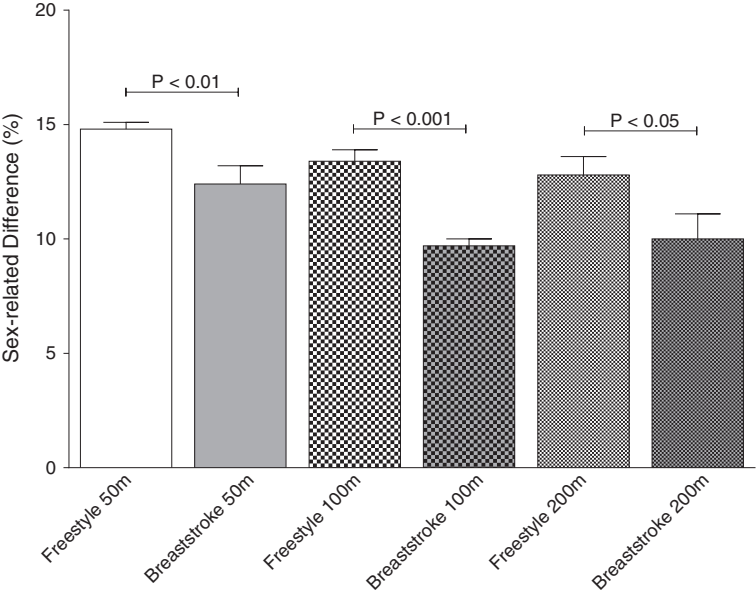

Supplement: MOESM1 [file 9686434]
